# Supplementary material for: Characterization of a Droplet Containing the Clustered Magnetic Beads Manipulation by Magnetically Actuated Chips
Source: MDPI journal article supplement (doi:10.3390/mi13101622), 2022-09-28
Supplement: s1 [file s1]

## Supplementary file S1

Consider a droplet that wetted on a surface due to surface tension. For simplicity, the wetting process assumes that the droplet remains spherical (Fig. S1). In the case of a spherical droplet, the relation between volume and diameter ( $d_D$ ) is as follows:

$$V_D = \frac{\pi}{6} d_D^3 \quad (S1)$$

Here  $V_D$  is the volume of the droplet.

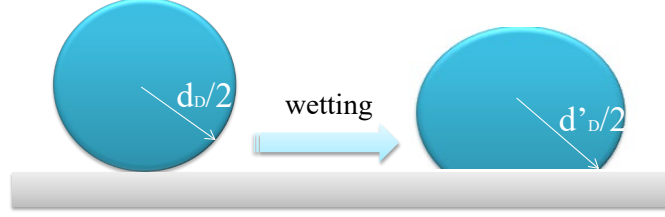

Figure S1. An illustration of a spherical droplet is wetting on the substrate.

For a wetting droplet illustrated in Fig. S2, the volume ( $V_D$ ), side surface area ( $A_{D,s}$ ), and base surface area ( $A_{D,b}$ ) with the spherical shape can be expressed as follows:

$$V'_D = \int_{\pi-\theta}^{\pi} \int_0^{2\pi} \int_0^{R'_D} r^2 \sin \phi dr d\phi d\phi = \frac{2\pi R_D'^3 (1 - \cos \theta)}{3} = \frac{\pi d_D'^3 (1 - \cos \theta)}{12} \quad (S2)$$

$$A'_{D,s} = \int_{\pi-\theta}^{\pi} \int_0^{2\pi} R_D'^2 \sin \theta d\phi d\phi = 2\pi R_D'^2 (1 - \cos \theta) = \frac{\pi d_D'^2 (1 - \cos \theta)}{4} \quad (S3)$$

$$A'_{D,b} = \int_0^{R'_D \sin \theta} \int_0^{2\pi} r dr d\phi = \pi R_D'^2 \sin^2 \theta = \frac{\pi d_D'^2 \sin^2 \theta}{4} \quad (S4)$$

where  $d'_D$  is wetting diameter of a droplet.

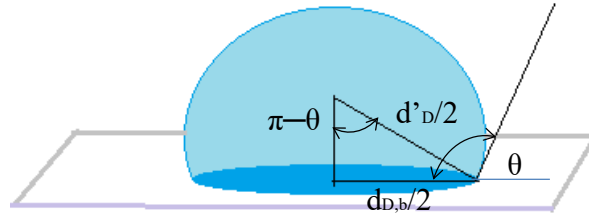

Figure S2. Schematic diagram of a droplet characterized by diameters of  $d'_D$ ,  $d_{D,b}$  and contact angle  $\theta$ .

By substituting Eq.(S-1) into Eq.(S-2), the diameter ( $d'_D$ ) of a wetting droplet is obtained as:

$$d'_D = \left( \frac{2}{(1 - \cos \theta)} \right)^{1/3} d_D \quad (S5)$$

According to the following expression, the droplet's base diameter ( $d_{D,b}$ ) is wetted with respect to the diameter ( $d'_D$ ) as shown in Fig. S3:

$$d_{D,b} = d'_D \sin(\pi - \theta) = \left( \frac{2 \sin^3 \theta}{(1 - \cos \theta)} \right)^{1/3} d_D \quad (S6)$$

The frictional force ( $F_\mu$ ) between a liquid droplet and a substrate surface can be expressed as the difference between gravitational force and buoyance force:

$$F_\mu = \mu_k (\rho_W V_D g - \rho_O V_D g) = \mu_k \Delta \rho V_D g \quad (S7)$$

where  $\mu_k$  is friction coefficient of the substrate surface.  $\Delta \rho$  is the difference density between liquid droplets and surrounding medium.  $g$  is gravitational acceleration. Upon moving onto a substrate, a droplet's surface tension is expressed in the following manner:

$$F_\gamma = \pi d_{D,b} \gamma_{O-W} \cos \theta \quad (S8)$$

where  $\theta$  is the contact angle.  $\gamma_{O-W}$  is the relative surface tension between liquid water and oil medium. When the droplet moves, determining the frictional force can be a challenge. Therefore, surface tension is used instead. In order to present the ratio between frictional force and surface tension force, the coefficient of  $\zeta$  is introduced to define as follows::

$$\zeta = \frac{F_f}{F_\gamma} = \frac{\mu_k \Delta \rho \frac{\pi}{6} d_D^3 g}{\pi d_{D,b} \gamma_{O-W} \cos \theta} \quad (S9)$$

By substituting Eq.(S-5) into Eq.(S-9) , the equation can be obtained as follows:

$$\zeta = \frac{\mu_k \Delta \rho \frac{\pi}{6} d_D^3 g}{\pi \left( \frac{2 \sin^3 \theta}{(1 - \cos \theta)} \right)^{1/3} d_D \gamma_{O-W} \cos \theta} \quad (S10)$$

$$= \frac{\mu_k \Delta \rho \left( \frac{6 V_D}{\pi} \right)^{2/3} g}{6 \gamma_{O-W} \left( 2 \sin^3 \theta \cos^3 \theta / (1 - \cos \theta) \right)^{1/3}} \quad (S11)$$

$$= \left( \frac{4(1 - \cos \theta)}{6 \pi^2 \sin^3 2\theta} \right)^{1/3} \frac{\mu_k \Delta \rho (V_D)^{2/3} g}{\gamma_{O-W}} \quad (S12)$$

$$= \left( \frac{2(1 - \cos \theta)}{3 \pi^2 \sin^3 2\theta} \right)^{1/3} \frac{\mu_k \Delta \rho (V_D)^{2/3} g}{\gamma_{O-W}}$$

In this study, the value of  $\zeta$  is calculated to be 0.001 while  $\mu=0.05$ ,  $\Delta \rho=60 \text{ kg/m}^3$ ,  $V_D=20 \mu \text{ L}$ ,  $\gamma_{O-W}=0.051 \text{ N/m}$ ,  $g=9.81 \text{ m/s}^2$ ,  $\theta=110^\circ$ .
